# Supplementary material for: Polatuzumab vedotin, rituximab, cyclophosphamide, doxorubicin, and prednisone (Pola-R-CHP) therapy in diffuse large B-cell lymphoma in patients aged 80 years or older: a real-world study
Source: Ann Hematol. 2025 Oct 10;104(10):5191–200. doi: 10.1007/s00277-025-06619-0 (PMC12619725; doi:10.1007/s00277-025-06619-0)
Supplement: Supplementary file 1 — Supplementary Material 1 (XLSX. 9.76 KB) [file 277_2025_6619_MOESM1_ESM.xlsx]

## Sheet: Sheet1
Table S1. Frequency and types of grade ≥3 adverse events in patients receiving Pola-R-CHP
Severe AE	n
Febrile neutropenia	20
Pnuemonia	15
COVID-19	15
Decreased appetite	12
Sepsis/bacteremia	5
Transaminases	5
Urinary infection	4
Fever without neutropenia	4
Gastrointestinal perforation	3
Varicella-zoster	3
fatigue	2
others	22
Abbreviations: AE, adverse event.
